# Supplementary material
Source: HighWire-hosted journal article supplement (https://www.genetics.org/content/suppl/2012/11/08/genetics.112.145599)
Supplement: genetics.112.145599-5.pdf [file genetics.112.145599-5.pdf]

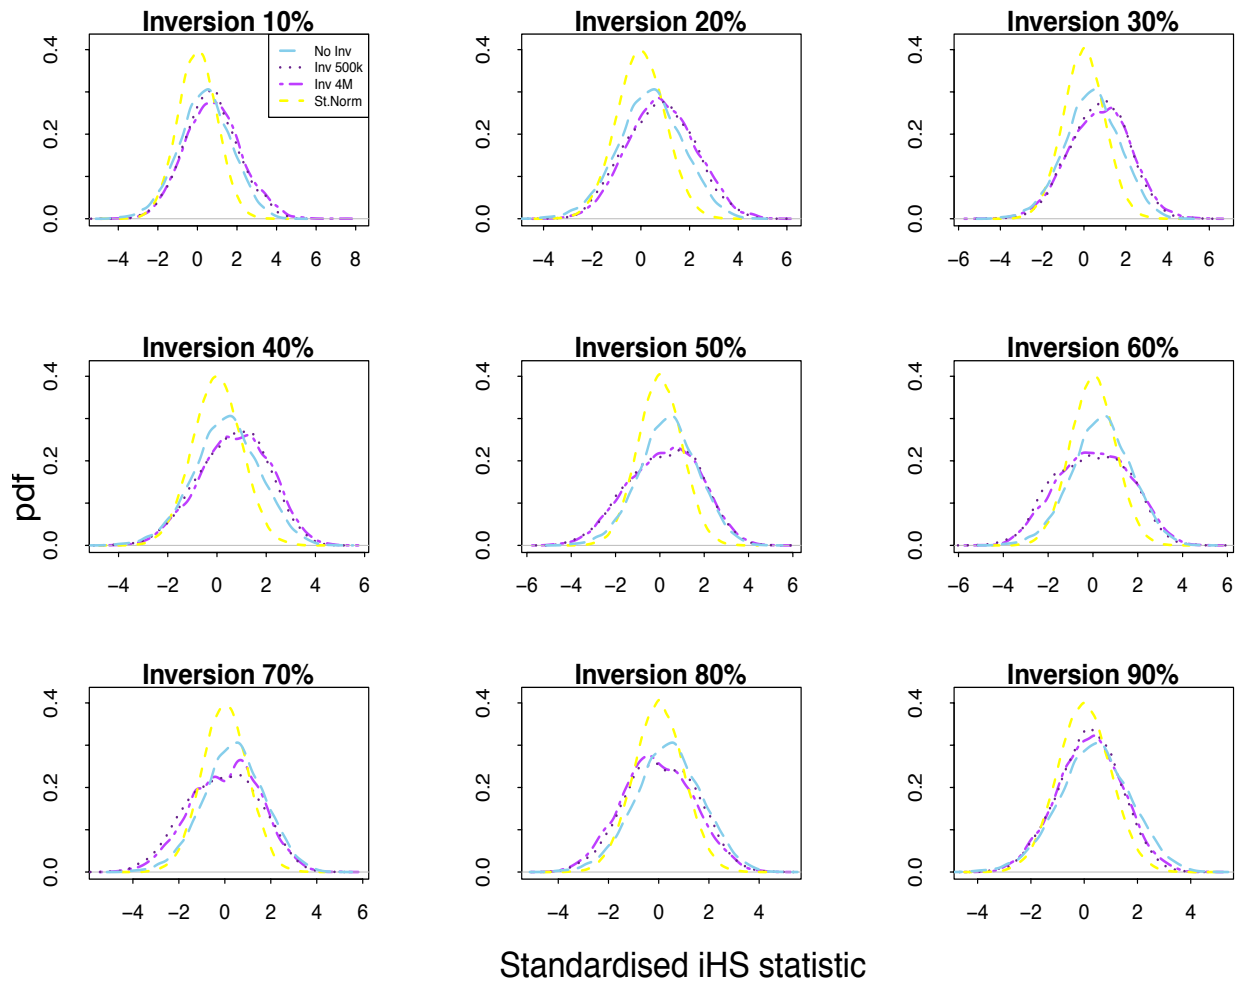

**Figure S3** Distribution of standardised iHS statistic at different inversion frequencies compared to the null distribution. Compares the standard normal distribution (yellow), the distribution of the standardised iHS statistic from simulated data without inversions (light blue), the distribution of the standardised iHS statistic calculated at the centre of a simulated inversion of length 500 kb (dashed purple) and 4 Mb (dotted purple), as described in the text, at different frequencies of the inverted sequence.
